# Supplementary material for: Ionic aggregation-induced emission dye with bulky counterions for preparation of bright near-infrared polymeric nanoparticles
Source: Royal Society of Chemistry journal article supplement (doi:10.1039/c9nr04085d), 2019-01-01
Supplement: c9nr04085d1.pdf [file c9nr04085d1.pdf]

**Electronic supplementary information**

**Ionic Aggregation-Induced Emission Dye with Bulky Counterions  
for Preparation of Bright Near-Infrared Polymeric Nanoparticles**

Nagappanpillai Adarsh and Andrey S. Klymchenko

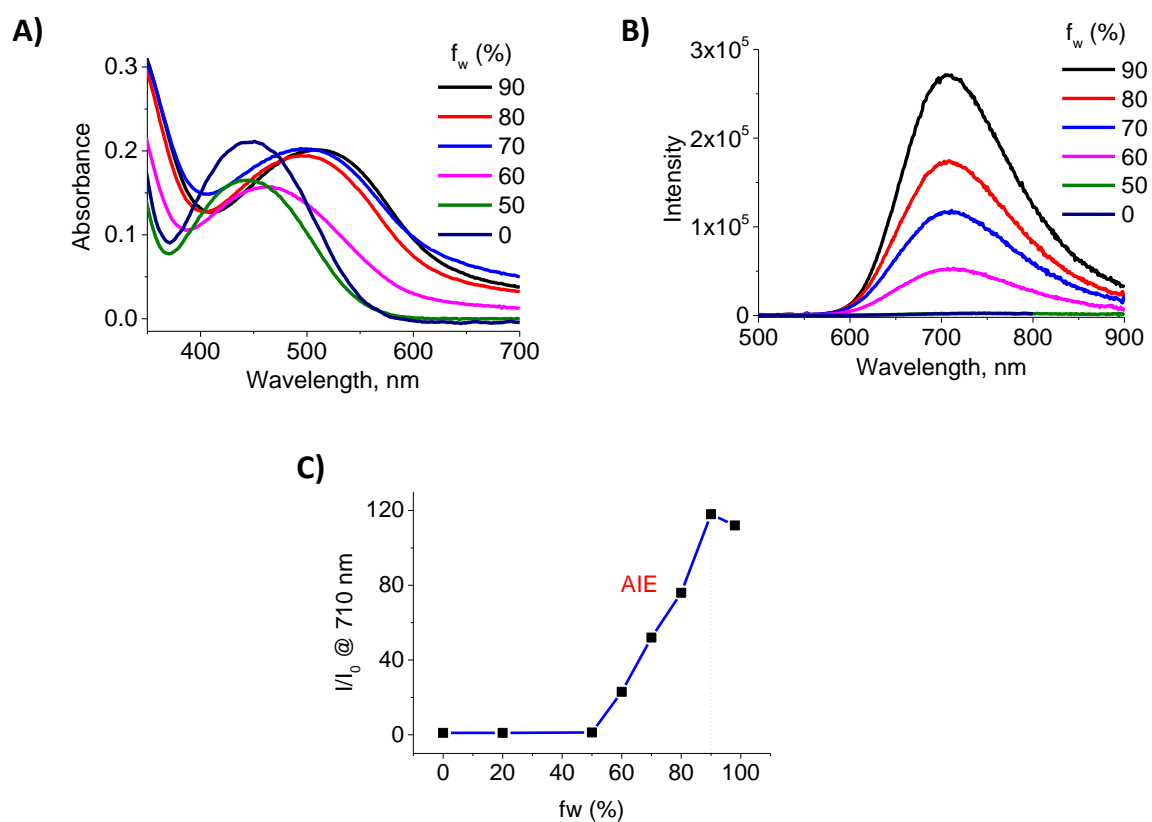

**Fig. S1.** AIE characteristics of **TPE-F5**. A) absorption and B) fluorescence spectra of **TPE-F5** in CH<sub>3</sub>CN-H<sub>2</sub>O mixtures with different water fractions ( $f_w$ ). C) Plot of the relative fluorescence intensity ( $I/I_0$ ) at 710 nm versus  $f_w$  of the CH<sub>3</sub>CN-H<sub>2</sub>O mixture of **TPE-F5**. Excitation wavelength: 450 nm.

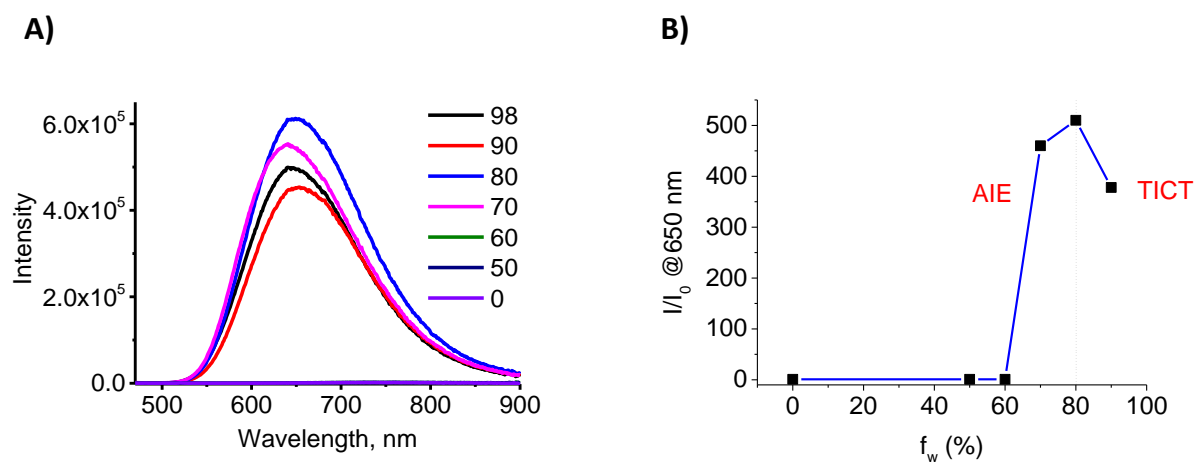

**Fig. S2.** AIE characteristics of **TPE-PF<sub>6</sub>**. A) Fluorescence spectra of **TPE-PF<sub>6</sub>** in CH<sub>3</sub>CN-H<sub>2</sub>O mixtures with different water fractions ( $f_w$ ) B) Plot of the relative fluorescence intensity ( $I/I_0$ ) at 650 nm versus  $f_w$  of the CH<sub>3</sub>CN-H<sub>2</sub>O mixture of **TPE-PF<sub>6</sub>**. Excitation wavelength: 450 nm.

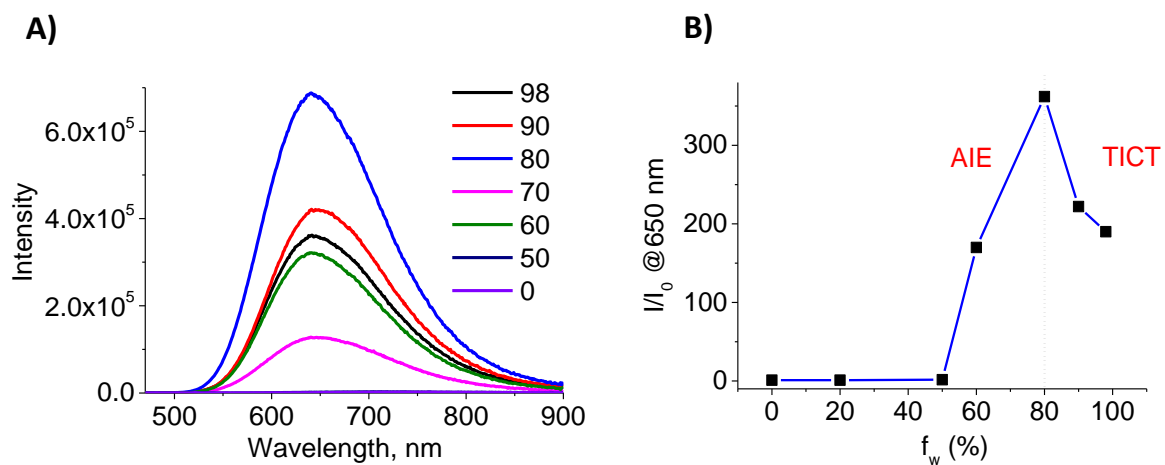

**Fig. S3.** AIE characteristics of **TPE-ClO<sub>4</sub>**. A) Fluorescence spectra of **TPE-ClO<sub>4</sub>** in CH<sub>3</sub>CN-H<sub>2</sub>O mixtures with different water fractions ( $f_w$ ). B) Plot of the relative fluorescence intensity ( $I/I_0$ ) at 650 nm versus  $f_w$  of the CH<sub>3</sub>CN-H<sub>2</sub>O mixture of **TPE-ClO<sub>4</sub>**. Excitation wavelength: 450 nm.

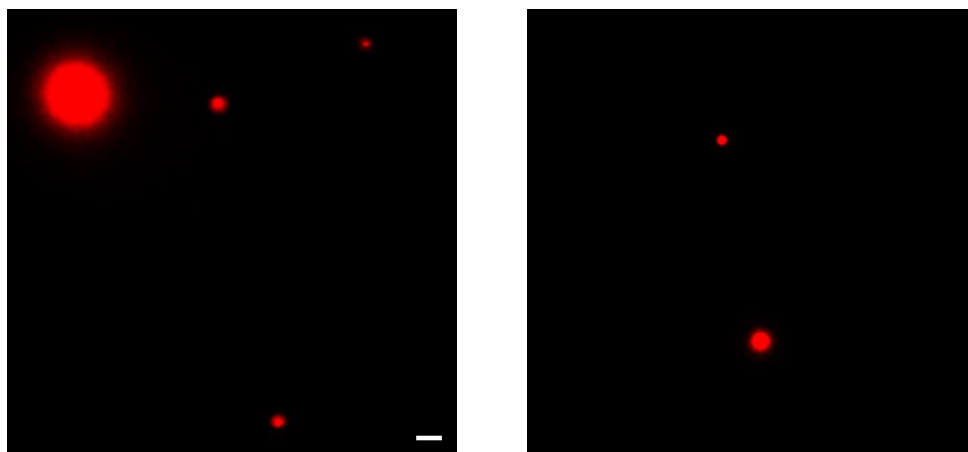

**Fig. S4.** Large aggregates observed for **TPE-PF6** polymeric NPs under wide-field fluorescence microscopy after immobilizing the particles on glass plates. Scale bar 10  $\mu$ M.

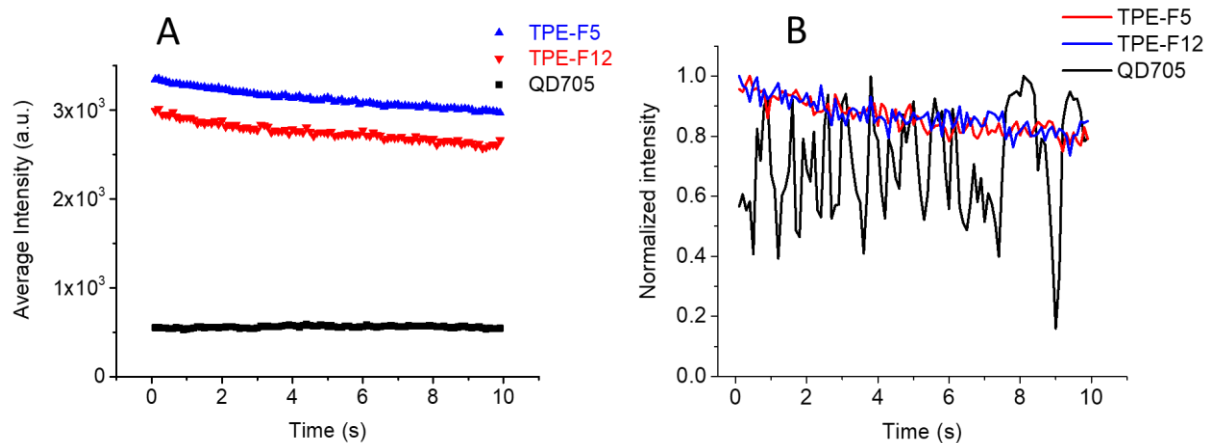

**Fig. S5.** Average intensity (A) and normalized single-particle intensity (B) as a function of time, recorded by a wide-field microscope. The excitation power density was  $7.6 \text{ W cm}^{-2}$  at 470 nm.

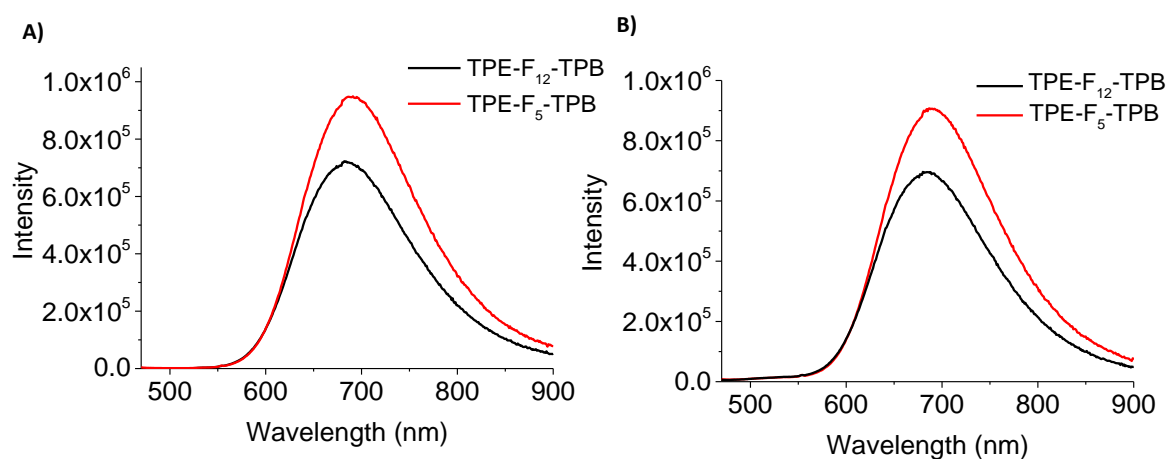

**Fig. S6.** Stability of emission properties of TPE NPs in Serum. Fluorescence spectra of **TPE-F12** and **TPE-F5** NPs in A) phosphate buffer (pH 7.4) and B) 10% FBS-Phosphate buffer (pH 7.4) after incubation for 1 h. Excitation wavelength: 450 nm.

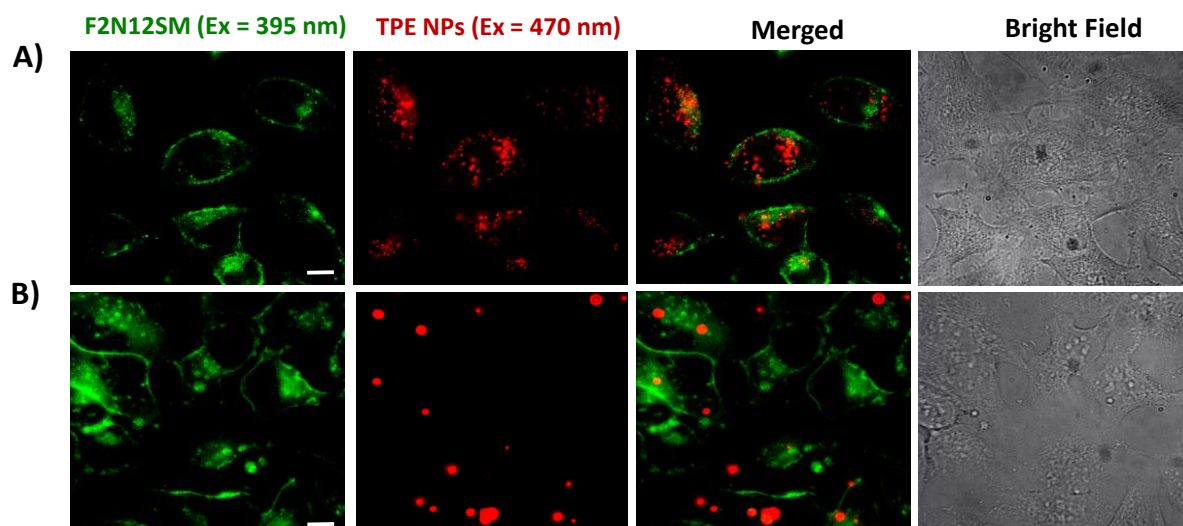

**Fig. S7.** Fluorescence imaging of HeLa cells incubated with **TPE-F5** PMMA-MA NPs or **TPE-PF6** NPs without polymer. The images correspond to A) **TPE-F5** polymeric NPs (PMMA-MA, 350 mM dye loading, pH 7.4), B) **TPE-PF6** (without polymer, pH 7.4) were incubated with HeLa cells for 3 h at 37 °C. The first column (in green) represents images of NPs after co-staining with a membrane marker **F2N12SM** using an excitation at 405 nm and a detection range of 450–500 nm, while second panels (red) present images of TPE polymeric NPs with an excitation of 488 nm and a detection range of 670–750 nm. Scale bar, 10  $\mu$ M. NPs were added to a final concentration corresponding to 210 nM of the loaded dye salt.

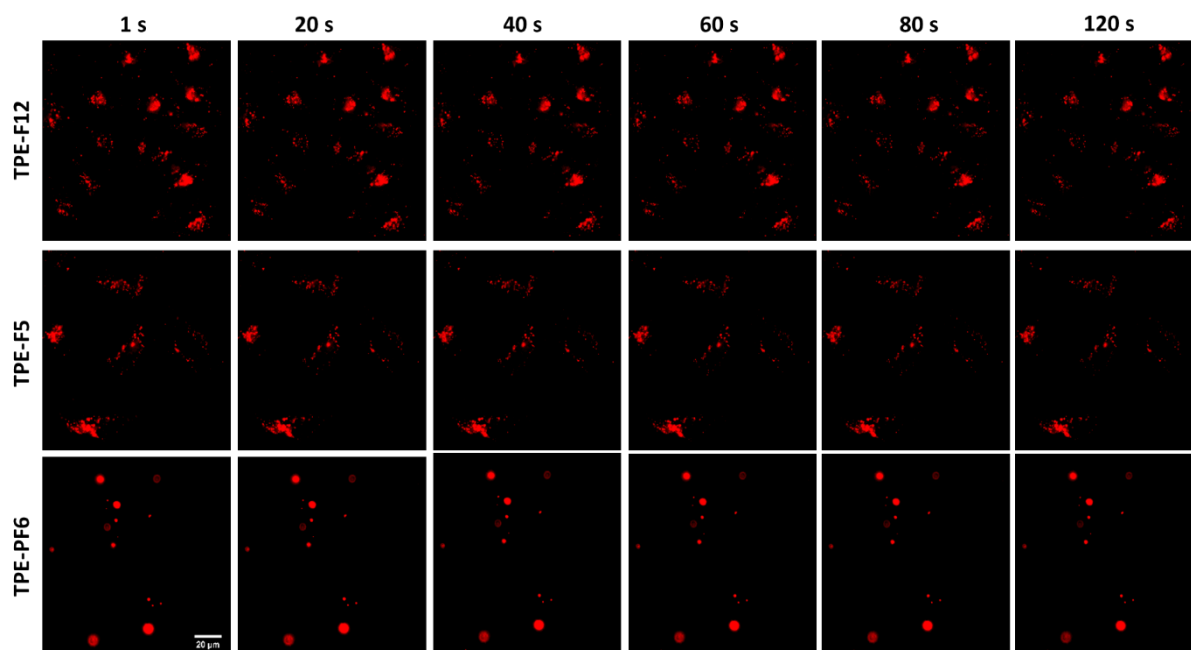

**Fig. S8.** Photostability of the TPE NPs in HeLa cells under continuous irradiation under wide-field microscope. The images correspond to polymeric NPs loaded with **TPE-F12** (top), **TPE-F5** (middle) and **TPE-PF6** (bottom) incubated with HeLa cells for 3 h at 37 °C taken during the continuous irradiation at 470 nm (60x objective, power density 2.5 W cm<sup>-2</sup>) and a detection range of 670-750 nm. Scale bar, 20 μM. NPs were added to a final concentration corresponding to 210 nM of the loaded dye salt.

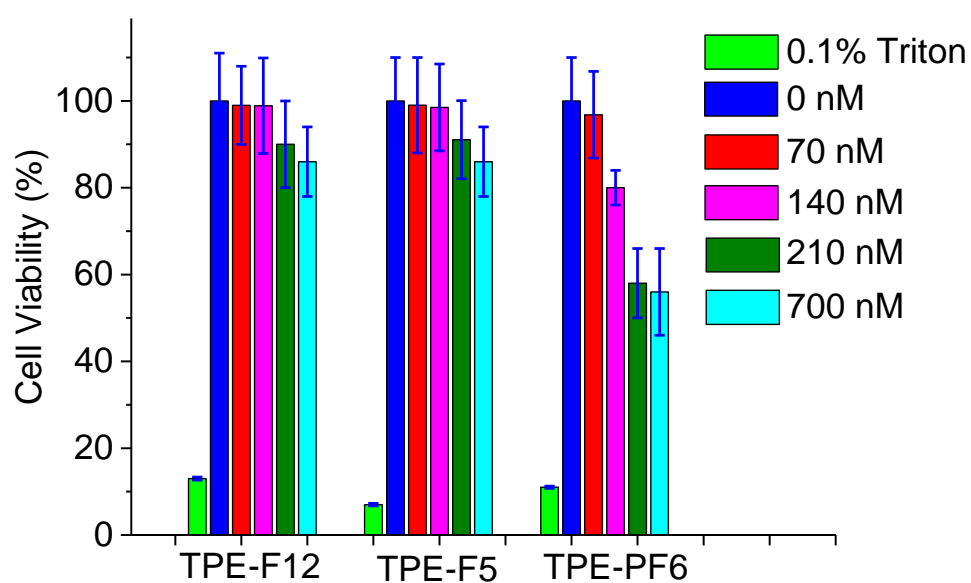

**Fig. S9.** Cytotoxicity of the TPE NPs in HeLa cells after 24 h incubation, using MTT assay. Final concentration of the loaded dye salt is presented. Triton X-100 (0.1%) was used as a positive control. The error is the standard deviation of the mean (n = 6).

**Table S1.** DLS data obtained for different AIEgens in water-acetonitrile mixtures.<sup>a</sup>

| $f_w(\%)$       | DLS Measurements |       |                       |       |                       |       |
|-----------------|------------------|-------|-----------------------|-------|-----------------------|-------|
|                 | TPE-F12          |       | TPE-F5                |       | TPE-PF6               |       |
|                 | Size (nm)        | PDI   | Size (nm)             | PDI   | Size (nm)             | PDI   |
| 90              | 115±2            | 0.120 | 240±10                | 0.143 | 60-5000 <sup>b</sup>  | 0.628 |
| 80              | 116±4            | 0.105 | 230±15                | 0.150 | 150-5000 <sup>b</sup> | 0.543 |
| 70              | 130±4            | 0.097 | 680±30                | 0.080 | 70-400 <sup>b</sup>   | 0.780 |
| 60              | 300±10           | 0.081 | 370±30                | 0.230 | 130-4000 <sup>b</sup> | 0.300 |
| 50              | 185±5            | 0.078 | 200-5000 <sup>b</sup> | 0.165 | 185±10                | 0.090 |
| 30              | 160±5            | 0.137 | 30-5000 <sup>b</sup>  | 0.300 | 100-4000 <sup>b</sup> | 0.300 |
| 10 <sup>c</sup> | -                | -     | -                     | -     | -                     | -     |

<sup>a</sup> The values are corrected for the viscosity of each solvent mixture.  $f_w(\%)$  is water fraction in the mixtures. <sup>b</sup> Broad range of sizes indicates a largely polydisperse sample with different populations observed in this range. <sup>c</sup> The signal was poor indicating absence of aggregates.
